# Supplementary material for: CryoEM structures of the multimeric secreted NS1, a major factor for dengue hemorrhagic fever
Source: PubMed Central journal article supplement (PMC9643530; doi:10.1038/s41467-022-34415-1), 2022-11-09
Supplement: 41467_2022_34415_MOESM1_ESM.pdf [file 41467_2022_34415_MOESM1_ESM.pdf]

1

## **Supplementary information**

### **CryoEM structures of the multimeric secreted NS1, a major factor for dengue hemorrhagic fever**

Bo Shu, Justin S.G. Ooi, Aaron W.K Tan, Thiam-Seng Ng, Wanwisa Dejnirattisai, Juthathip Mongkolsapaya, Guntur Fibriansah, Jian Shi, Victor A. Kostyuchenko, Gavin R. Screaton, Shee-Mei Lok\*

2 \*Correspondence: Shee-Mei Lok ([sheemei.lok@duke-nus.edu.sg](mailto:sheemei.lok@duke-nus.edu.sg))

3 **Supplementary Fig. 1**

4

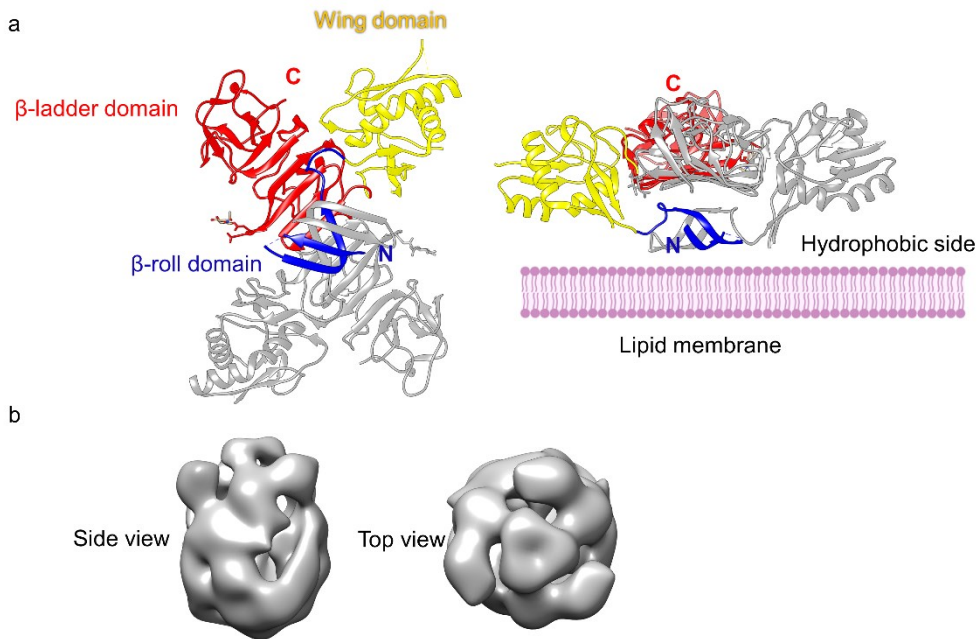

5

6 **Supplementary Fig. 1 Previously published structures of the dengue NS1.** (a) Crystal  
7 structure of dengue dimeric iNS1 (PDB:4O6B). Left: top view, looking from the  $\beta$ -roll of the  
8 iNS1 dimer. One protomer contains three domains: starting from the N-terminus-  $\beta$ -roll  
9 (blue), wing domain (yellow) and the  $\beta$ -ladder (red). It interacts with the other protomer  
10 (colored in grey) through extensive hydrogen bonds. Right: side view of the iNS1 dimer. The  
11  $\beta$ -roll is highly hydrophobic and is predicted to interact with the cellular membrane. (b) A  
12 previously published low resolution EM reconstruction of the sNS1 (EMD-2073). This map  
13 is reconstructed from negatively stained sNS1 and C3 symmetry was imposed<sup>14</sup>.

14

15 **Supplementary Fig. 2**

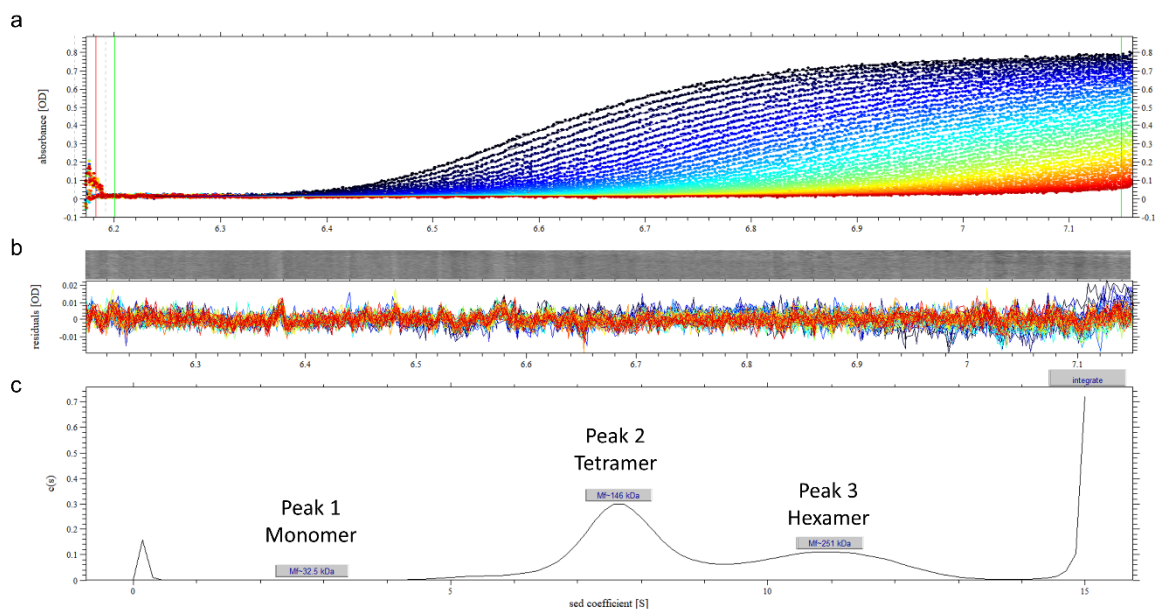

16

17

18 **Supplementary Fig. 2 Sedimentation velocity analytical ultracentrifugation experiment**

19 **of the recombinant sNS1.** (a) Raw sedimentation profiles of absorbance at 280 nm versus

20 particle radius for the recombinant sNS1. The sedimentation scans were coloured with the

21 progressive rainbow colours according to the software default setting (b) Residual plot

22 supplied by SEDFIT software showing the fitting goodness. (c) Continuous sedimentation

23 coefficient distribution of the different sNS1 particle population – monomer, tetramers and

24 hexamers with estimated MW of 32.5 kDa, 146 kDa and 251 kDa, respectively.

25

26 **Supplementary Fig. 3**

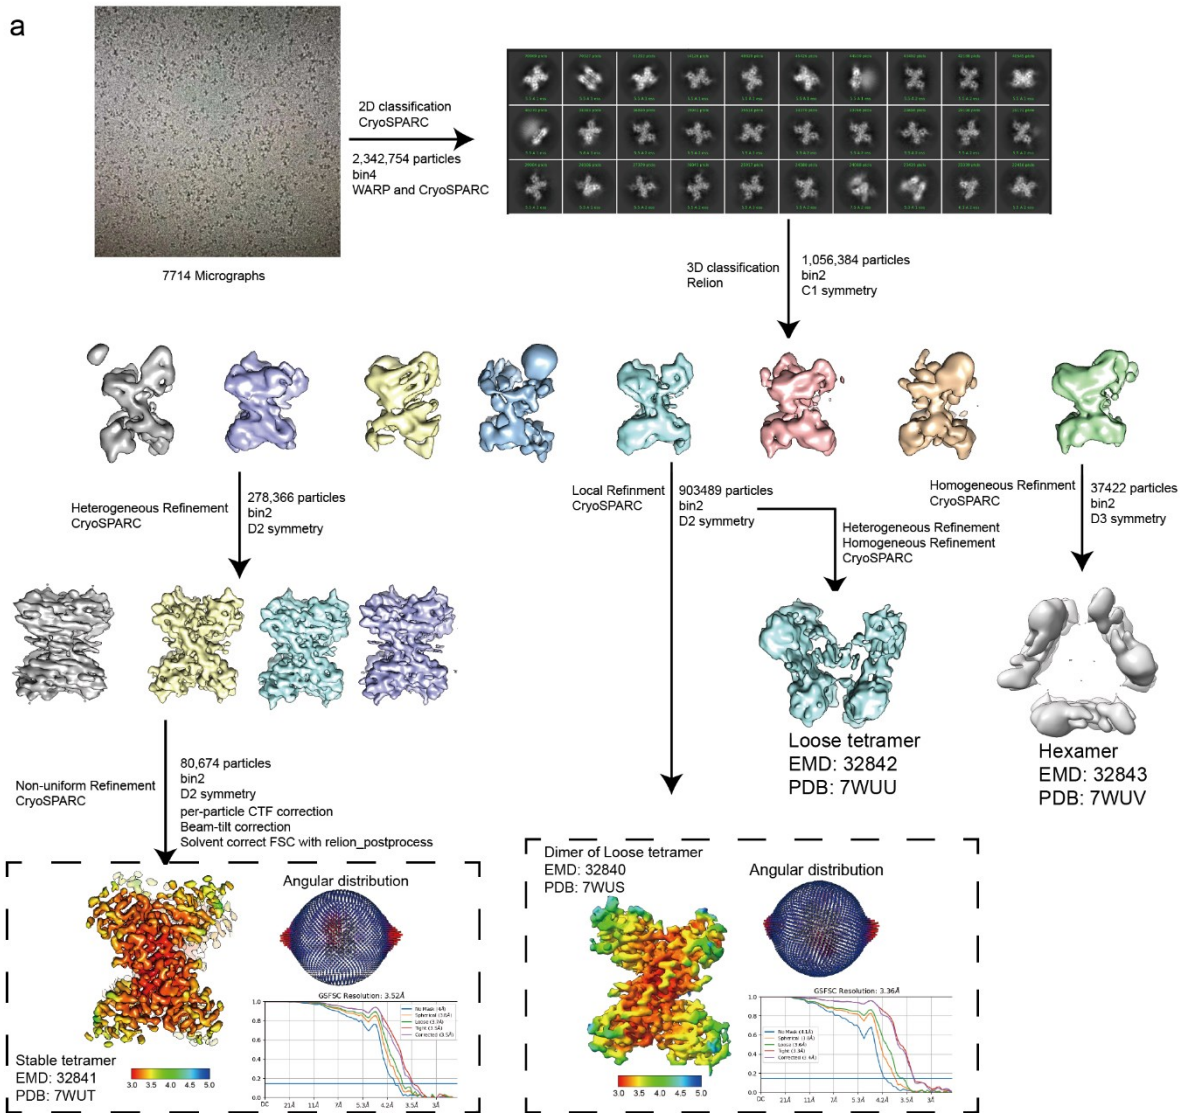

27  
28

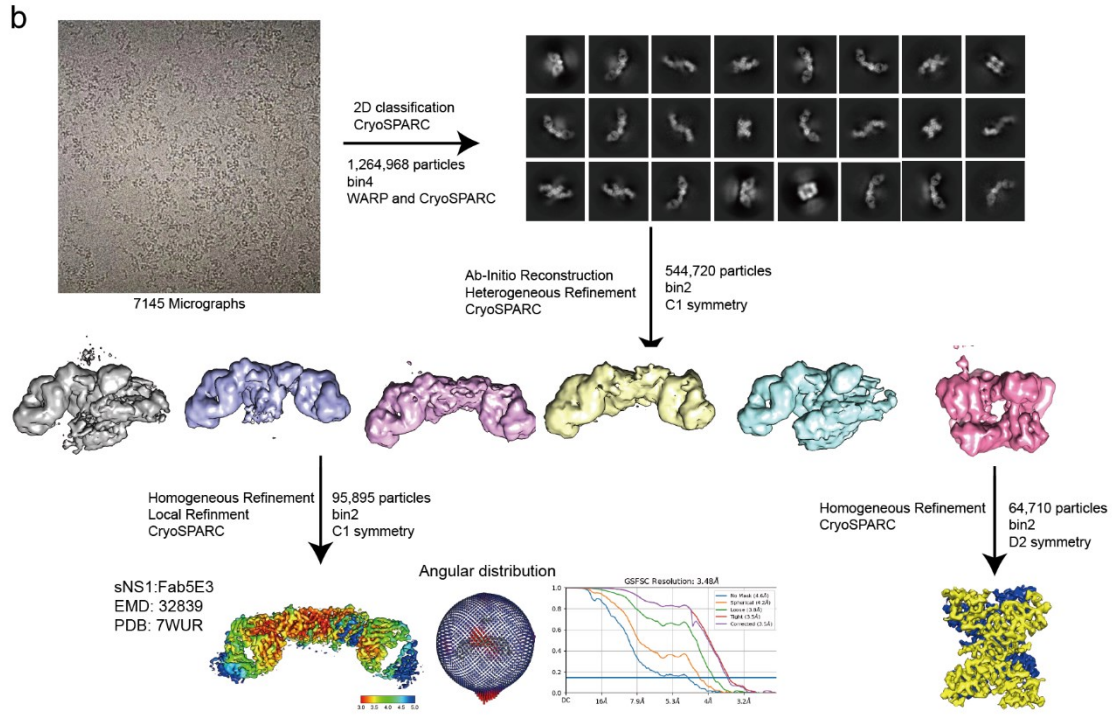

29  
30

31 **Supplementary Fig. 3 The cryoEM reconstruction workflow for uncomplexed sNS1 and**  
 32 **NS1:Fab5E3 complex.** (a,b) Representative micrograph, 2D class averages, representative  
 33 3D classes, map colored to resolution, and angular distribution of particles shown for cryoEM  
 34 datasets.

35

36 **Supplementary Fig. 4**

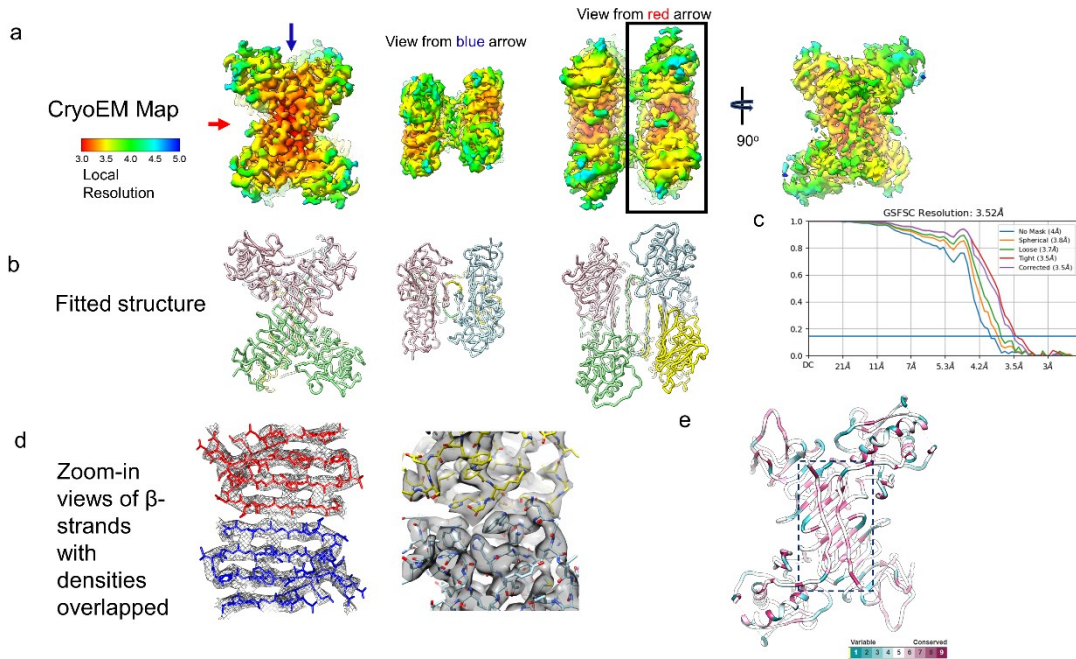

37

38 **Supplementary Fig. 4 The 3.5Å resolution sNS1 stable tetrameric structure.** (a) Different  
 39 views of the cryoEM map displayed at high contour level. The densities are colored  
 40 according to their local resolution. (b) The fitted structure show in the same view as the  
 41 cryoEM map directly above (in (a)). There are two dimers facing each other. One dimer is  
 42 colored in pink and green, while the other is light blue and yellow. (c) Fourier shell  
 43 correlation plot showing resolution. (d) Zoom-in views of density map showing the β-strands  
 44 densities are well resolved (left). Some of the side chains densities (right) can also be  
 45 observed. (e) The NS1 surface is colored according to sequence conservation from the most  
 46 conserved (dark magenta) to the most divergent (dark cyan) based on an alignment of NS1  
 47 sequences from 130 flaviviruses using the ConSurf server. The result shows that most region  
 48 of the elongated β-sheet (dotted black lines) is conserved.

49

50

51



52 **Supplementary Fig. 5**

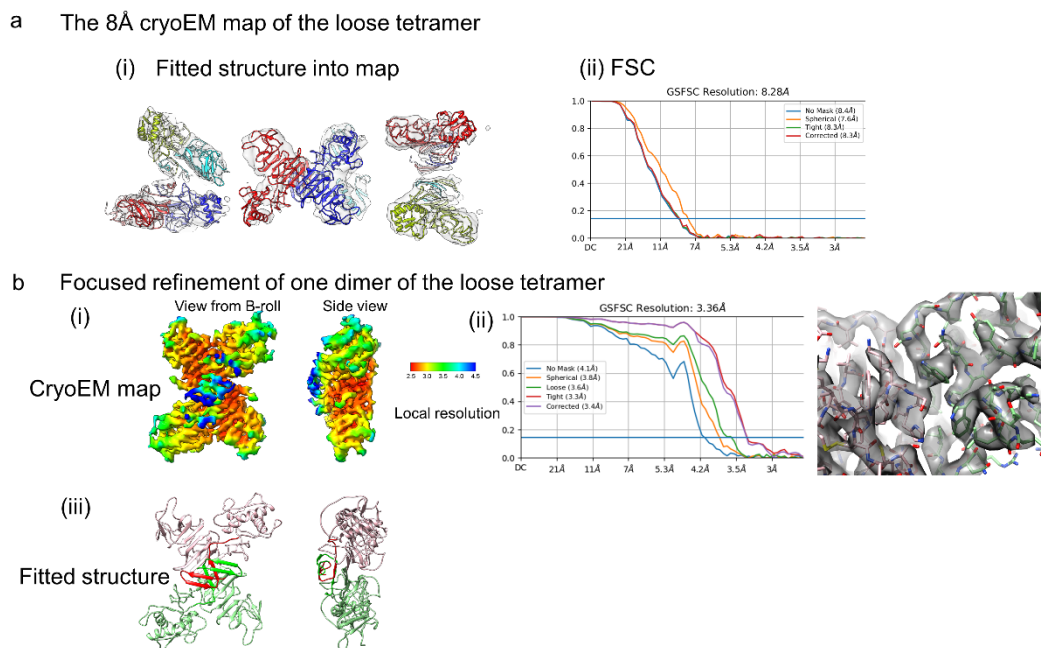

53

54 **Supplementary Fig. 5 CryoEM maps of the sNS1 loose tetramer.** (a) The 8Å cryoEM map of the  
 55 loose tetramer. (i) Different views of the fitted structure of the loose tetramer into the density map  
 56 (transparent grey). (ii) FSC plot showing resolution. (b) The 3.4Å cryoEM map of one dimer of the  
 57 loose tetramer after focused refinement. (i) Different views of the cryoEM map. Density is colored  
 58 according to local resolution. (ii) Up: FSC plot showing resolution of the map: Down: zoom-in view  
 59 showing that some side chain densities are well resolved. (iii) The fitted structure of one of the dimers  
 60 (pink and light green) is very similar to that of dengue iNS1. The β-roll in each protomer is colored in  
 61 a darker shade of the respective protomer's color.

62 **Supplementary Fig. 6**

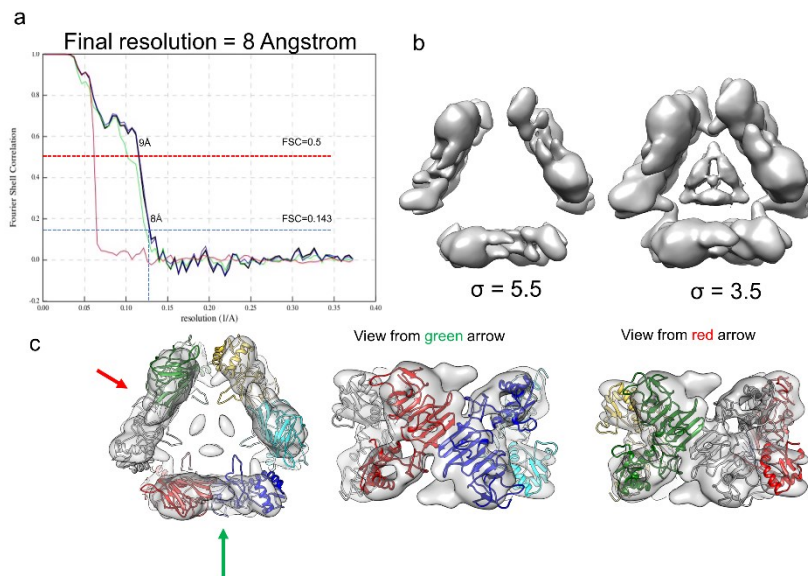

63

64 **Supplementary Fig. 6 The 8Å cryoEM map of the SNS1 hexamer.** (a) FSC plot showing  
65 resolution of the map. (b) The hexamer density displayed at different contour levels. At lower  
66 contour levels, densities at the interior of the hexamer can be seen. (c) Different views of the  
67 fit of the three dimers into the hexamer density map.

68



69 **Supplementary Fig. 7**

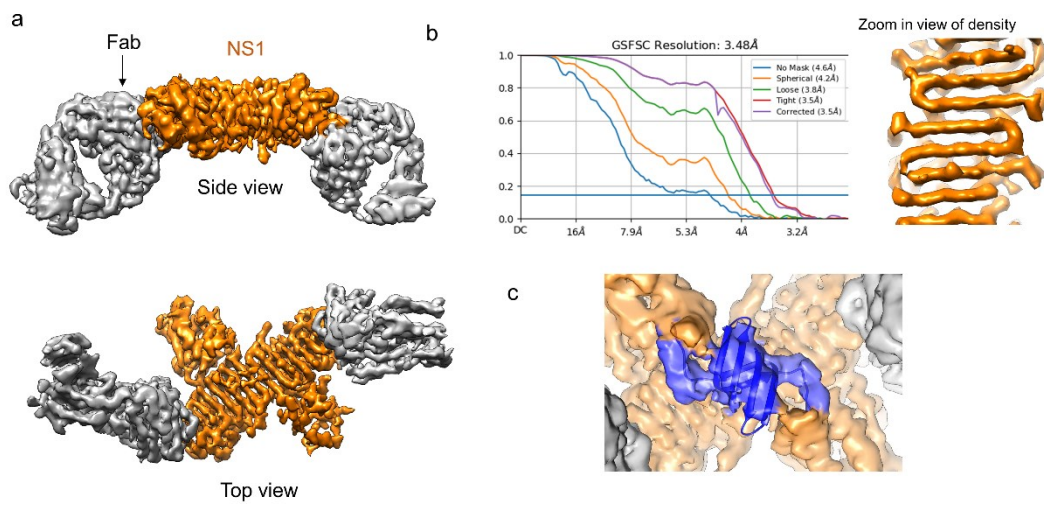

70

71 **Supplementary Fig. 7 The 3.5Å resolution cryoEM structure of Fab 5E3:sNS1 dimer.** (a)  
72 Side and top views of the cryoEM map of the Fab 5E3:sNS1 dimer. NS1 is colored in orange  
73 while Fabs are shown in grey. (b) Left: FSC plot showing the resolution of the map. Right:  
74 zoom-in view showing well-resolved β-strands. (c) Zoom-in view of the fitted β-roll into its  
75 corresponding density.

76

77

78 **Supplementary Fig. 8**

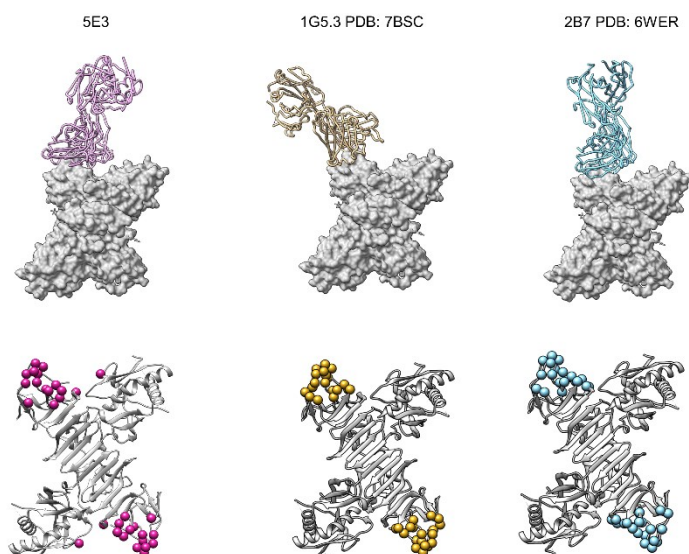

79

80

81 **Supplementary Fig. 8 Comparison of the binding (top panels) and epitope (bottom**  
82 **panels) of Fab 5E3 to other previously published Fab:NS1 complexes<sup>20,21</sup>.**

83

84

85 **Supplementary Fig. 9**

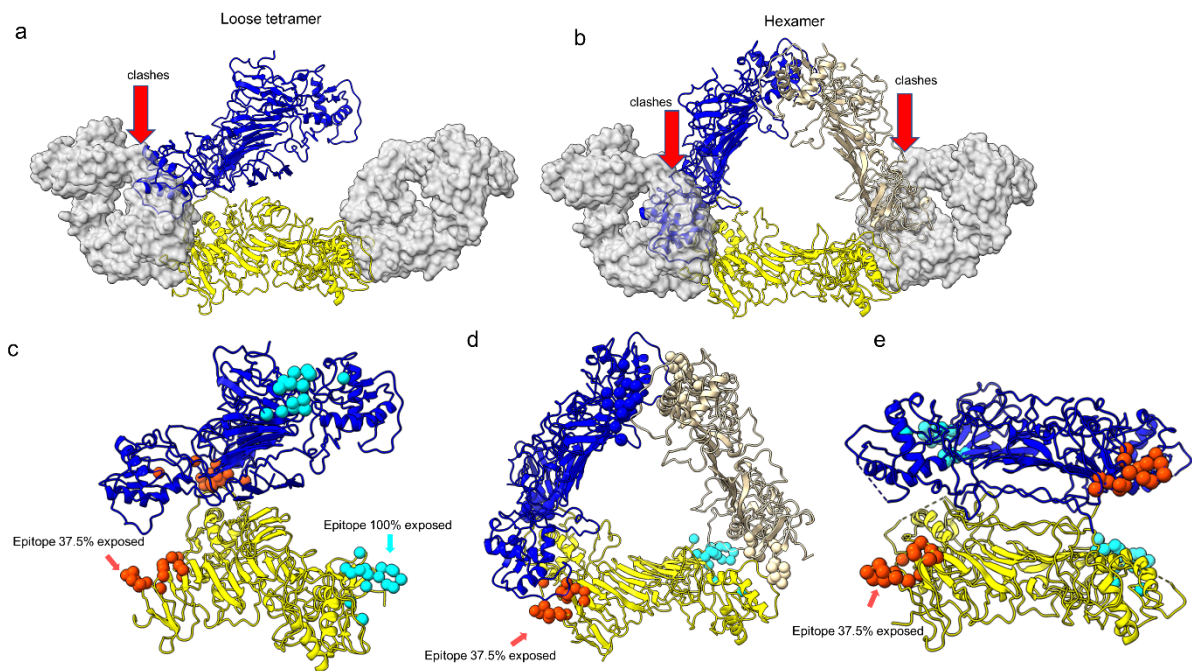

86

87 **Supplementary Fig. 9 Superposition of Fab 5E3:dimer onto the (a) loose tetramer and**  
88 **(b) hexamer and the analysis of percentage exposure of epitopes (c-e) in the stable, loose**  
89 **tetramers and hexamers.** (a-b) Superposition of Fab 5E3:dimer onto one dimer (yellow) of  
90 the loose tetramer and hexamer. Fab is shown as transparent grey surface and clashes with  
91 neighboring NS1 dimer are indicated with red arrows. (c-e) The percentage exposure of  
92 epitopes in the oligomers. The two epitopes within one dimer are colored in orange and cyan.  
93 (c) In the loose tetramer, 37.5% of the orange epitope is exposed while the cyan epitope is  
94 fully exposed (100%). (d) In the hexamer, 37.5% of both the orange and cyan epitopes are  
95 exposed. (e) In the stable tetramer, the two epitopes are both 37.5% exposed.

96

97

98 **Supplementary Fig. 10**

99

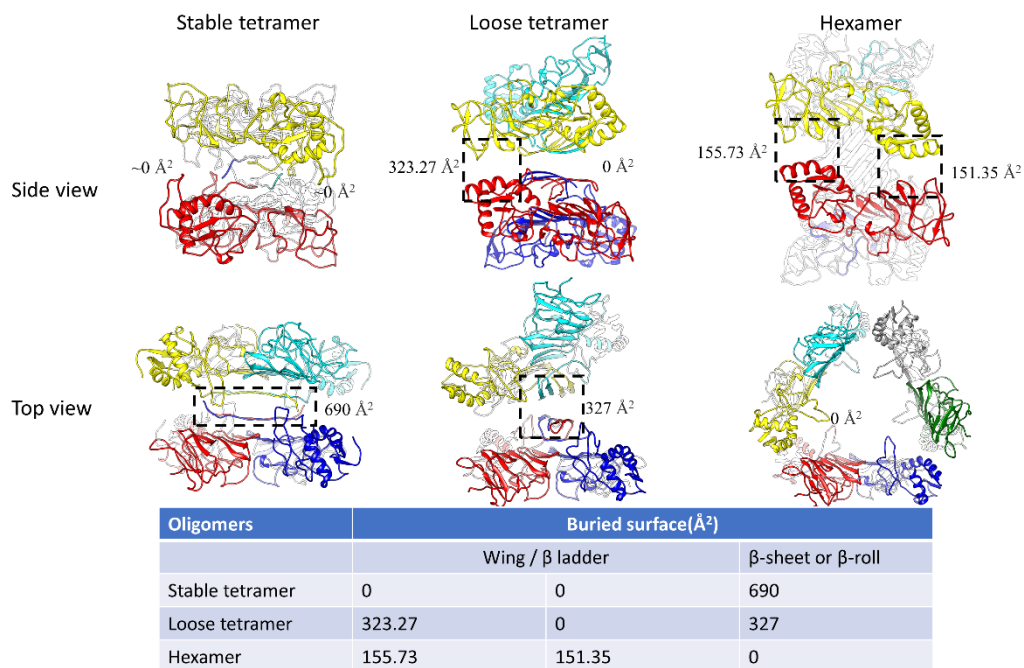

100

101 **Supplementary Fig. 10 Buried surface areas between two neighboring dimers of the**  
 102 **different oligomeric states of the sNS1.** The buried surface is calculated by the software  
 103 ChimeraX.

104

105 **Supplementary Fig. 11**

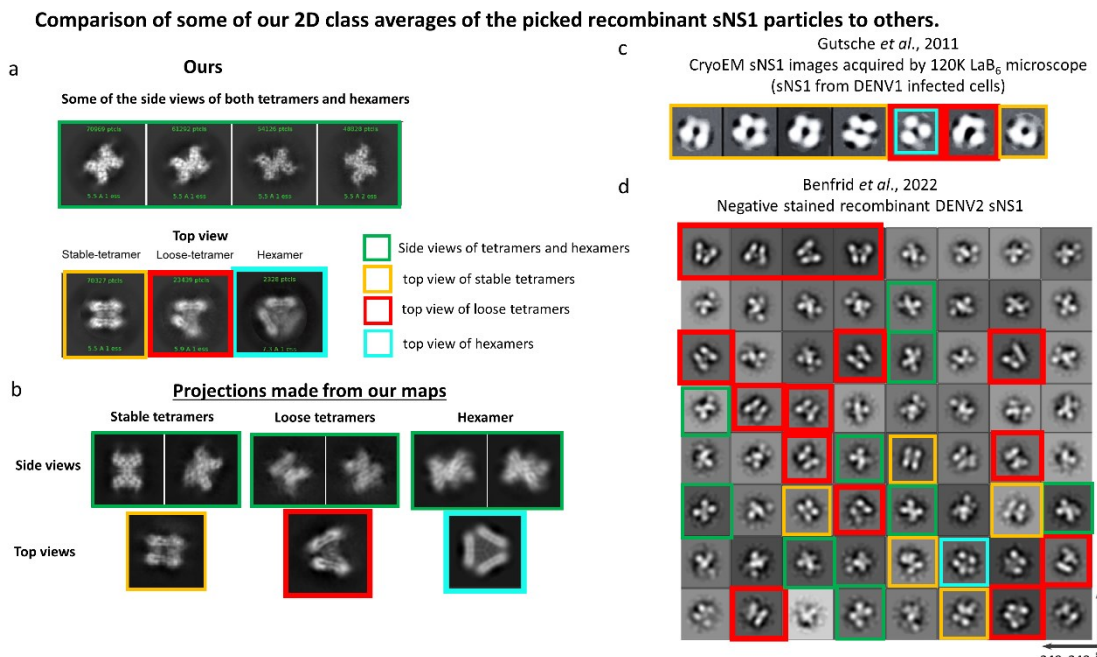

106

107 **Supplementary Fig. 11 Comparison of the cryoEM micrographs and 2D averages from**  
 108 **(a) our sample with that in (c) Gutsche et al., 2011<sup>15</sup> and (d) Benfrid et al., 2022<sup>23</sup>. (b)**

109 Projections made from our cryoEM maps of the stable and loose tetramers and also the  
 110 hexamer representing some of the side and top views of each structure. Possible similar  
 111 projections are boxed in the same color. In (d), the unboxed class averages are largely the  
 112 different orientations of the side views. Panel c is obtained from Gutsche et al., 2011, while  
 113 panel d, from Benfrid et al., 2022. We thank the corresponding authors and the journals,  
 114 respectively, for the permission to use these figures.

115

116

117 **Supplementary Fig. 12**

**Test: our data treat as homogenous hexamer for reconstruction - no classification and D3 symmetry applied**

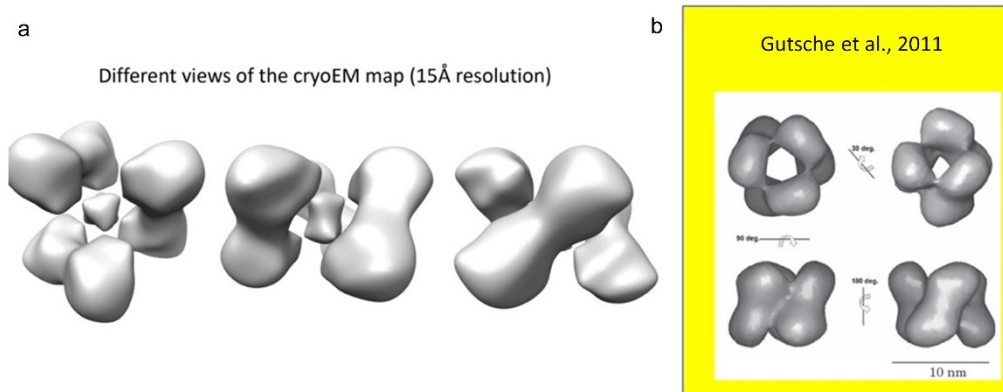

118  
119 **Supplementary Fig. 12 Comparison of the resultant cryoEM map of the test**  
120 **reconstruction with our dataset and assuming the particles are homogenously hexameric,**  
121 **with that obtained by Gutsche et al., 2011<sup>15</sup>.** (a) Three dimensional reconstruction by using  
122 30,000 randomly selected particles from our recombinant sNS1 sample and assuming the  
123 particles are homogenously hexamers (no classification was done and D3 symmetry was  
124 applied) shows a low resolution cryoEM map. This map appears to be similar to that reported  
125 by (b) Gutsche et al., 2011. This image is obtained from Gutsche et al., 2011, we thank the  
126 corresponding author for the permission to use it.

127



128 **Supplementary Fig. 13**

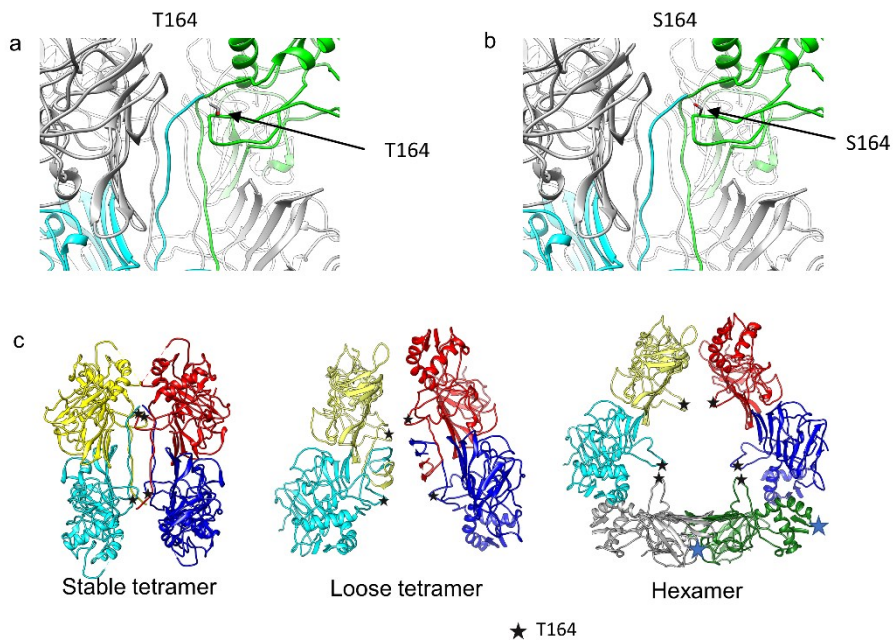

129

130 **Supplementary Fig. 13 Zoom-in view of regions around residue 164.** (a) Zoom-in view of  
131 regions around residue 164. This residue lies in close proximity ( $C\alpha$ - $C\alpha$  backbone distance is  
132 5.8Å) to the highly hydrophilic elongated  $\beta$ -sheet of the opposite dimer. (b) A homology  
133 model of stable tetramer with S164 mutation showed that the mutation might increase the  
134 hydrophilicity of that region leading to increased interactions with the opposite dimer. (c)  
135 black Five-pointed star indicates where the T164 are in different oligomers of the sNS1  
136

|                                                     | DENV2_NS1_Tetramer                  | DENV2_NS1_dimer                     | DENV_NS1_Fab5E3                     |
|-----------------------------------------------------|-------------------------------------|-------------------------------------|-------------------------------------|
| <b>Data collection and processing</b>               | (EMDB-32841)<br>(PDB 7WUT)          | (EMDB-32840)<br>(PDB 7WUS)          | (EMDB-32839)<br>(PDB 7WUR)          |
| Microscope                                          | FEI Titan Krios                     | FEI Titan Krios                     | FEI Titan Krios                     |
| Camera                                              | Gatan K3                            | Gatan K3                            | Gatan K3                            |
| Magnification                                       | 130,000 ×                           | 130,000 ×                           | 130,000 ×                           |
| Voltage (kV)                                        | 300                                 | 300                                 | 300                                 |
| Electron exposure (e <sup>-</sup> /Å <sup>2</sup> ) | 81.5                                | 81.5                                | 80.1                                |
| Defocus range (μm)                                  | -0.8 to -2.0                        | -0.8 to -2.0                        | -0.8 to -2.0                        |
| Exposure rate (e <sup>-</sup> /Å <sup>2</sup> /sec) | 8.74                                | 8.86                                | 8.35                                |
| Number of frames per movie                          | 58                                  | 58                                  | 58                                  |
| Pixel size (Å)                                      | 0.66                                | 0.66                                | 0.66                                |
| Energy filter slit width (eV)                       | 20                                  | 20                                  | 20                                  |
| Automation software                                 | SerialEM                            | SerialEM                            | SerialEM                            |
| Symmetry imposed                                    | D2                                  | C1                                  | C1                                  |
| Micrographs used                                    | 7,714                               | 7,714                               | 7,145                               |
| Total number of extracted particles                 | 2,342,754                           | 2,342,754                           | 1,264,968                           |
| Total number of refined particles                   | 278,366                             | 454,477                             | 273,074                             |
| Number of particles in final map                    | 80,674                              | 181,587                             | 95,895                              |
| Map resolution (Å)                                  | 3.5                                 | 3.3                                 | 3.5                                 |
| FSC threshold                                       | 0.143                               | 0.143                               | 0.143                               |
| <b>Refinement</b>                                   |                                     |                                     |                                     |
| Initial model used (PDB code)                       | 5GS6                                | 5GS6                                | 5GS6                                |
| Refinement package, (resolution cutoff)             | Phenix, real-space refinement (3.7) | Phenix, real-space refinement (3.4) | Phenix, real-space refinement (3.5) |

|                                                                        |                                          |                                          |                                          |
|------------------------------------------------------------------------|------------------------------------------|------------------------------------------|------------------------------------------|
| Resolution of unmasked and masked reconstructions at 0.5 and 0.143 FSC | Unmasked<br>3.5/4.1<br>Masked<br>3.4/4.1 | Unmasked<br>3.6/4.0<br>Masked<br>3.5/3.9 | Unmasked<br>3.4/3.8<br>Masked<br>3.4/3.6 |
| Map sharpening $B$ factor ( $\text{\AA}^2$ )                           | -230                                     | -210                                     | -105.9                                   |
| Model composition                                                      |                                          |                                          |                                          |
| Non-hydrogen atoms                                                     | 9,732                                    | 5,450                                    | 8,922                                    |
| Protein residues                                                       | 1264                                     | 682                                      | 1134                                     |
| Ligands                                                                | 0                                        | 0                                        | 0                                        |
| Global CC (CCvol)                                                      | 0.77                                     | 0.74                                     | 0.84                                     |
| Local CC (CCmask)                                                      | 0.78                                     | 0.75                                     | 0.84                                     |
| $B$ factors ( $\text{\AA}^2$ )                                         |                                          |                                          |                                          |
| Protein                                                                | 92.57                                    | 52.17                                    | 89.33                                    |
| Ligand                                                                 | -                                        | -                                        | -                                        |
| R.m.s. deviations                                                      |                                          |                                          |                                          |
| Bond lengths ( $\text{\AA}$ )                                          | 0.003                                    | 0.003                                    | 0.003                                    |
| Bond angles ( $^\circ$ )                                               | 0.834                                    | 0.753                                    | 0.666                                    |
| Validation                                                             |                                          |                                          |                                          |
| MolProbity score                                                       | 2.29                                     | 2.10                                     | 2.04                                     |
| Clashscore                                                             | 13.93                                    | 11.9                                     | 11.28                                    |
| Poor rotamers (%)                                                      | 0.20                                     | 0.67                                     | 0.31                                     |
| C-beta deviations                                                      | 0.00                                     | 0.00                                     | 0.00                                     |
| Ramachandran plot                                                      |                                          |                                          |                                          |
| Favored (%)                                                            | 86.38                                    | 91.45                                    | 92.42                                    |
| Allowed (%)                                                            | 13.30                                    | 8.55                                     | 7.58                                     |
| Disallowed (%)                                                         | 0.32                                     | 0                                        | 0                                        |
| CaBLAM outliers (%)                                                    | 7.63                                     | 5.93                                     | 3.78                                     |

EMRinger score

1.34

1.76

2.51

---

137

138 **Supplementary Table 1 Cryo-EM data collection, refinement and validation statistics**

139

a

|            | Stable Tetramer | Loose Tetramer | Hexamer |
|------------|-----------------|----------------|---------|
| Particles  | 126130          | 90928          | 0       |
| Percentage | 58%             | 42%            | 0 %     |

b

|            | Stable Tetramer | Loose Tetramer | Hexamer |
|------------|-----------------|----------------|---------|
| Particles  | 315671          | 102939         | 0       |
| Percentage | 75.4%           | 24.6%          | 0 %     |

140

141 **Supplementary Table 2 The percentage of particles in different oligomerization states**  
142 **determined after 3D classification of (a) sNS1 treated with detergent (0.05% DDM) and**  
143 **(b) the STconc\_sNS1 sample.**

144

| <b>NS1</b> | <b>Fab Heavy Chain</b>       | <b>Fab Light Chain</b> |
|------------|------------------------------|------------------------|
| <b>138</b> |                              | <b>27(CDR1)</b>        |
| <b>269</b> |                              | <b>94(CDR3)</b>        |
| <b>281</b> | <b>52/53/54/55/56(CDR2)</b>  |                        |
| <b>299</b> | <b>102/103(CDR3)</b>         |                        |
| <b>301</b> | <b>33(CDR1)</b>              |                        |
| <b>302</b> | <b>103(CDR3)</b>             |                        |
| <b>303</b> | <b>103(CDR3)</b>             |                        |
| <b>304</b> | <b>32/106(CDR1/CDR3)</b>     |                        |
| <b>305</b> | <b>31/33/103(CDR1/CDR3)</b>  |                        |
| <b>306</b> | <b>31(CDR1)</b>              |                        |
| <b>307</b> | <b>31/53(CDR1/CDR2)</b>      |                        |
| <b>324</b> | <b>56(CDR2)</b>              |                        |
| <b>325</b> | <b>57(CDR2)</b>              |                        |
| <b>326</b> | <b>57/102/100(CDR2/CDR3)</b> |                        |
| <b>327</b> | <b>100/102(CDR3)</b>         | <b>94(CDR3)</b>        |
| <b>328</b> | <b>100(CDR3)</b>             |                        |

145 **Supplementary Table 3 List of hydrogen bonds/electrostatic interactions between Fab**  
146 **5E3 (heavy and light chains) with the NS1 protein. The interacting CDRs of the Fabs**  
147 **are indicated.**

148  
149
